# Supplementary material for: The Effect of a Preceptor Training Program on Respiratory Therapy Preceptors: A quasi-experimental Study
Source: Research Square preprint supplement (doi:10.21203/rs.3.rs-6586936/v1), 2025-11-21
Supplement: Supplementary file 1 [file f00d41f34fbb840be87a7e7f.docx]

**Section A. Needs Assessment Questionnaire**

| Survey of Respiratory Therapist Preceptors  Preceptor Training Program Needs Assessment  Part 1: Demographics   1. age? (21-29/ 30-39/ 40-49/ 50 and above) 2. gender? (Male/Female) 3. Experience as a respiratory therapist/technician (RT)? (less than 1 year/ 1-3 years/ 3-5 years/ more than 5 years) 4. Type of RT degree? (Diploma/ Bachelor/ Master)   Part 2: Preceptor Training Needs   1. In your career as RT, have you been asked to train new employees and/or act as preceptors to clinical interns/students? (Yes/ No) 2. Do you feel you are given enough mentoring and training for the preceptor role? (Yes/ No/ Somewhat) 3. Did you receive any type of training *prior* to receiving interns/students? (Yes/ No/ Somewhat)    1. Describe the type of training that you received *prior* to receiving interns/students? (classroom/ Videos/ computer-based training/ workshops in-person or online)    2. Describe the length of the training you received *prior* to receiving interns/students? (4hours (Half day)/ 8hours (Full day)/ 2-3 days/ more than 3 days) 4. Do you think RTs should receive training prior to receiving interns/ students? (Yes/ No/ Maybe)    1. Would you attend a preceptor training workshop held by your institution? (Yes/ No/ Maybe)    2. What type of training modality is most appropriate for preceptor training workshop? (classroom/ Videos/ computer-based training/ workshops in- person or online)    3. What is an appropriate length for a preceptor training workshop? (4hours (Half day)/ 8hours (Full day)/ 2-3 days/ more than 3 days) 5. Do you think it should be *mandatory* to receive preceptor training *prior* to receiving interns/students?   Part 3: Topics for preceptor training program  Please indicate how important the following topics for a preceptor training program   |  | Important | Somewhat important | Not important | | --- | --- | --- | --- | | Roles and responsibilities of preceptor  and preceptee |  |  |  | | Basic principles of adult learning |  |  |  | | Learning needs and styles |  |  |  | | Student needs in a clinical learning  environment |  |  |  | | Principles of student assessment |  |  |  | | Evaluation of student clinical performance |  |  |  | | Providing effective feedback |  |  |  | | Communication skills |  |  |  | | Teamwork and collaboration |  |  |  | | Ethics |  |  |  | | Inclusion and diversity |  |  |  | | Teaching strategies |  |  |  | | Managing emotions |  |  |  | | Commitment to teaching |  |  |  | |
| --- | --- | --- | --- | --- | --- | --- | --- | --- | --- | --- | --- | --- | --- | --- | --- | --- | --- | --- | --- | --- | --- | --- | --- | --- | --- | --- | --- | --- | --- | --- | --- | --- | --- | --- | --- | --- | --- | --- | --- | --- | --- | --- | --- | --- | --- | --- | --- | --- | --- | --- | --- | --- | --- | --- | --- | --- | --- | --- | --- | --- |
|  |
| **Section B. Pre-/Post-Knowledge Test**  Survey of Respiratory Therapist Preceptors  Preceptor Training Program Pre-Test/Post-test     1. Which of the following assessment methods is most appropriate to evaluate what the intern DOES?    1. Case presentation ×    2. OSCE    3. Direct observation    4. MCQs questions 2. The responsibility of orienting the preceptee/intern to the environment and introducing them to the norms of the workplace is under which role of the preceptor?    1. Role model    2. Educator    3. Mentor    4. Socializer × 3. In which phase of Kolb’s cycle does the learner ask themselves the question “What did I experience”?    1. Concrete experience    2. Reflective observation ×    3. Abstract conceptualization    4. Active experimentation 4. ________ happens when the learner proactively acts motivationally and behaviourally to fill a gap in knowledge.    1. Reflective process    2. Giving feedback    3. Self-efficacy    4. Self-regulated learning × 5. Which of the following is considered intrinsic motivation?    1. Avoiding public embarrassment in multidisciplinary rounds for “lack of knowledge”    2. Earning end of year bonus for highest evaluation score    3. Improving self-efficacy and own image ×    4. Increasing rapport between peers and superiors 6. Which model of feedback invites the preceptee to reflect and self-assess?    1. Sandwich Model    2. Miller Pyramid    3. Kolb’s cycle    4. Pendleton’s rule × 7. “You always forget to do Allen’s test with withdrawing a blood sample. You never checked for collateral blood.”   Which of the following feedback properties needs improving?   - 1. Two-way conversation   2. Non-judgmental ×   3. Timely   4. Constructive  1. Believing that one has the skills to achieve a specific action is the definition of which of the following?    1. Self-regulated learning    2. External motivation    3. Self-efficacy ×    4. Professionalism 2. Which clinical teaching tool is most effective to be used with novice learner to introduce a sophisticated clinical skill?    1. Active observation ×    2. Effective questioning    3. One-minute preceptor    4. Sink-or-swim technique 3. The most appropriate workplace-based assessment to evaluate the preceptee’s overall attitude and professionalism from multiple sources?    1. DOPS    2. OSCE    3. Debriefing    4. 360 feedback × 4. Allowing the preceptee to perform a self-assessment triggers which important step in the learning process?    1. Debriefing    2. Reflection ×    3. Questioning    4. Active observation 5. Which of the following is considered a characteristic of adult learning?    1. They are mostly externally motivated to learn.    2. They fully depend on Teacher/instructor to target learning needs    3. Their life experience is negligible to learning    4. They take responsibility for learning × |
| **Section C. Program Satisfaction Survey**  Survey of Respiratory Therapist Preceptors  Preceptor Training Program Satisfaction survey    Please check (X) your response to each evaluation statement:     | Strongly agree | Agree | Neutral | Disagree | Strongly disagree | | --- | --- | --- | --- | --- | | 5 | 4 | 3 | 2 | 1 |   Program Content   - The content of the program was informative and important - I found the content of the program easy to understand - The program material was organized and well-arranged - The amount of material covered was suitable to the topic of training   Program methodology   - I found the methods of program delivery flexible and convenient - I found the program interactive and effective - The audio-visual aids were helpful - The time it took to finish the program was reasonable   Program applicability   - I can apply what I learned from this program to my daily job - My future students/interns will have a better preceptorship experience after I participated in this program - The program improved the quality of my clinical teaching - I found this program beneficial to my work   Overall   - I am overall satisfied with this program   Do you have any suggestions/comments that will help make the program better? |
